# Supplementary material
Source: publisher figshare collection journal article supplement (https://tandf.figshare.com/ndownloader/files/13593959)

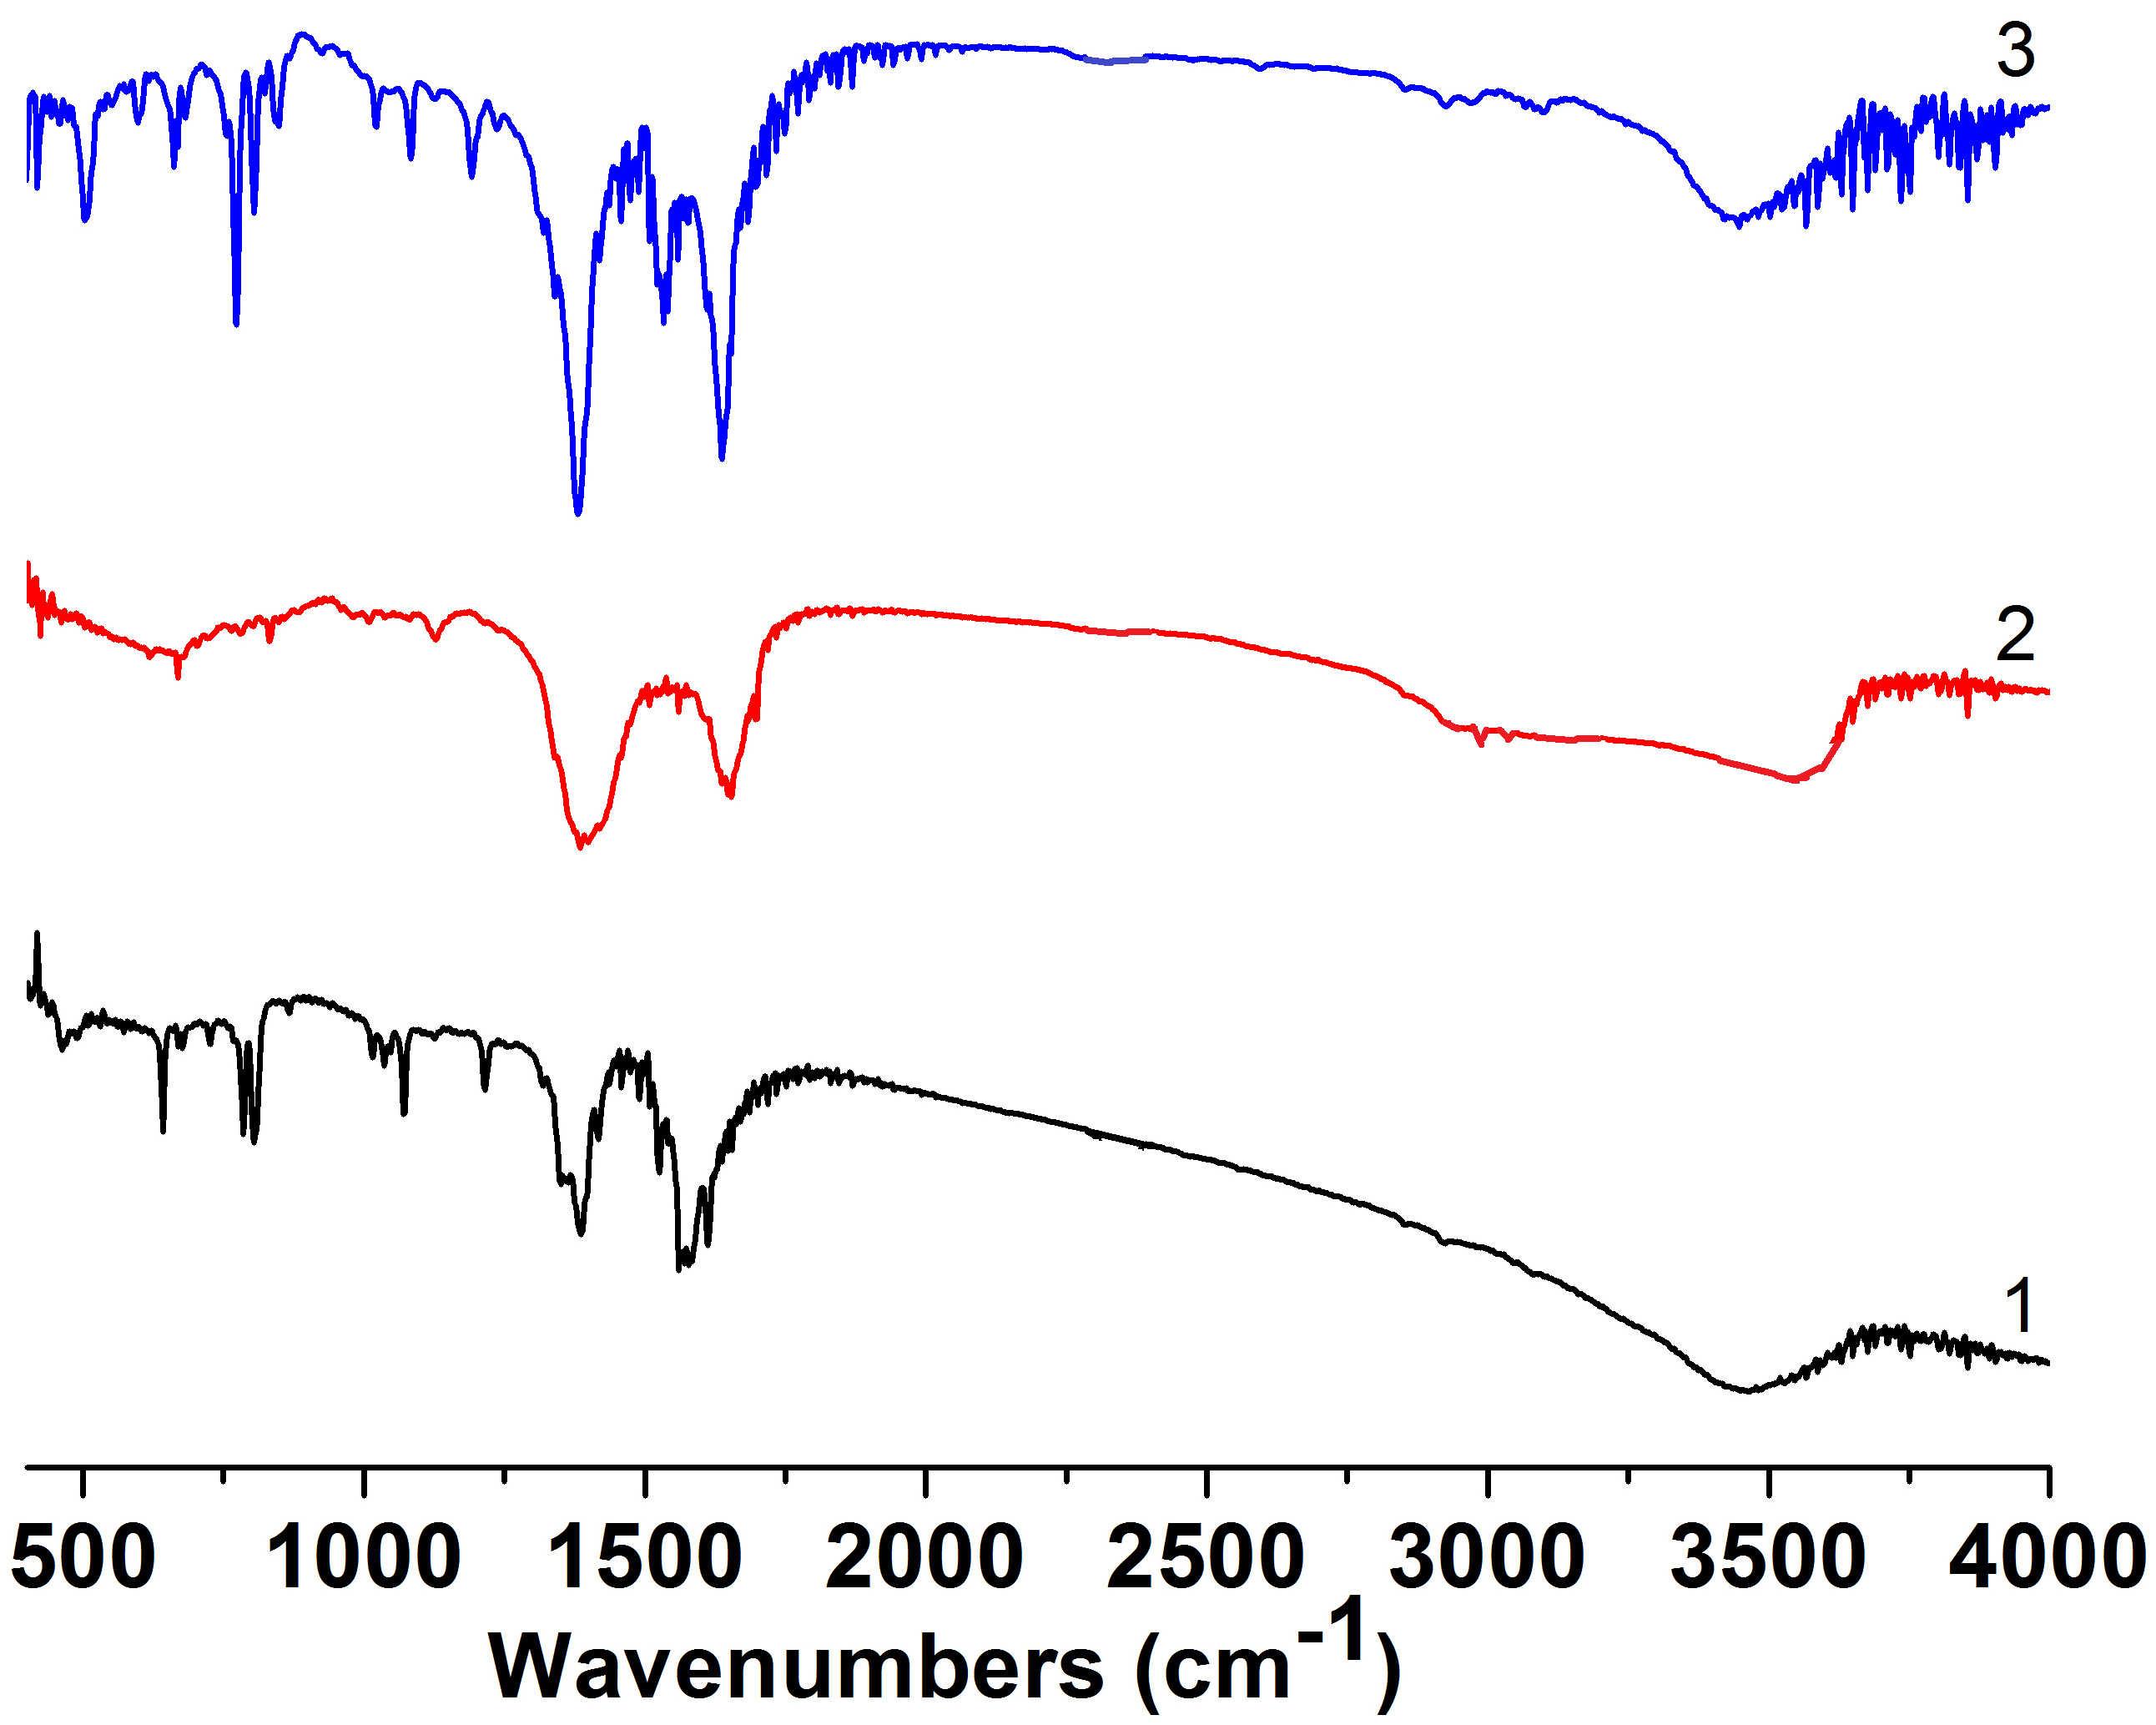


**Fig. S1** The IR spectra of **1-3**.

Supplement: Supplementary file 1 [file 13593959]
